# Supplementary material for: Dual transcriptomics to determine interferon-gamma independent host response to intestinal Cryptosporidium parvum infection
Source: Research Square preprint supplement (doi:10.21203/rs.3.rs-491899/v1), 2021-05-14
Supplement: Supplementary file 1 [file 0b5f8ffaccd80853bcb89515.docx]

**Table 2: Top ten more abundant *C. parvum* transcripts in STAg-treated Ileum. (For a complete list see Supplemental File 11)**

|  | **CryptoDB_ID** | **Transcript name** | **Average**  **Counts** | **Mouse 1** | **Mouse 2** | **Mouse 3** |
| --- | --- | --- | --- | --- | --- | --- |
| 1 | cgd6_10 | Proteophosphoglycan | 5938 | 4943 | 5784 | 7088 |
| 2 | cgd4_3630 | Cross-beta structure silk protein 1 | 3007 | 2621 | 3043 | 3357 |
| 3 | cgd2_410 | Signal peptide-containing protein-Mucin 3 | 2099 | 1659 | 1984 | 2654 |
| 4 | cgd6_1070 | Uncharacterized protein | 1989 | 1747 | 1975 | 2246 |
| 5 | cgd4_3410 | RNA recognition motif/WW domain-containing protein | 1877 | 1515 | 1837 | 2281 |
| 6 | cgd3_550 | Major Facilitator Superfamily | 1875 | 1612 | 1687 | 2327 |
| 7 | cgd3_500 | GDP-fucose transporter | 1582 | 1306 | 1596 | 1844 |
| 8 | cgd2_430 | Signal peptide-containing protein-cpMUC5 | 1567 | 1424 | 1591 | 1687 |
| 9 | cgd8_550 | Uncharacterized protein | 1512 | 1239 | 1542 | 1755 |
| 10 | cgd2_450 | Signal peptide-containing protein-cPMUC7  CIPW_000002748 | 1447 | 1286 | 1485 | 1569 |
