# Supplementary material for: Dual transcriptomics to determine interferon-gamma independent host response to intestinal Cryptosporidium parvum infection
Source: Research Square preprint supplement (doi:10.21203/rs.3.rs-491899/v1), 2021-05-14
Supplement: Supplementary file 1 [file 48e2a1af126df841435a56fb.docx]

**Table S3: *C. parvum* all possible comparisons between tissue and treatment**

|  | Group 1 | | Group 2 | |  |
| --- | --- | --- | --- | --- | --- |
| **Comparison** | **Tissue** | **Treatment** | **Tissue** | **Treatment** | **File Name (.csv)** |
| 9 | Ileum | STAg | Cecum | STAg | Supplemental_file_9 |
| 10 | Ileum | PBS | Cecum | PBS | Supplemental_file_10 |
| 11 | Ileum | STAg | Ileum | PBS | Supplemental_file_11 |
| 12 | Cecum | STAg | Cecum | PBS | Supplemental_file_12 |
