# Supplementary material for: Dual transcriptomics to determine interferon-gamma independent host response to intestinal Cryptosporidium parvum infection
Source: Research Square preprint supplement (doi:10.21203/rs.3.rs-491899/v1), 2021-05-14
Supplement: Supplementary file 4 [file 960255b8ac328a57931911b9.docx]

**Table S2: Host all possible comparisons between tissue, treatment, and infection status**

|  | Group 1 | | | Group 2 | | |  |
| --- | --- | --- | --- | --- | --- | --- | --- |
| **Comparison** | **Tissue** | **Infection** | **Treatment** | **Tissue** | **Infection** | **Treatment** | **File Name (.csv)** |
| 1 | Ileum | Infected | STAg | Ileum | Infected | PBS | Supplemental_file_1 |
| 2 | Ileum | Uninfected | STAg | Ileum | Uninfected | PBS | Supplemental_file_2 |
| 3 | Cecum | Infected | STAg | Cecum | Infected | PBS | Supplemental_file_3 |
| 4 | Cecum | Uninfected | STAg | Cecum | Uninfected | PBS | Supplemental_file_4 |
| 5 | Ileum | Infected | STAg | Ileum | Uninfected | STAg | Supplemental_file_5 |
| 6 | Ileum | Infected | PBS | Ileum | Uninfected | PBS | Supplemental_file_6 |
| 7 | Cecum | Infected | STAg | Cecum | Uninfected | STAg | Supplemental_file_7 |
| 8 | Cecum | Infected | PBS | Cecum | Uninfected | PBS | Supplemental_file_8 |
