# Supplementary material for: Dual transcriptomics to determine interferon-gamma independent host response to intestinal Cryptosporidium parvum infection
Source: Research Square preprint supplement (doi:10.21203/rs.3.rs-491899/v1), 2021-05-14
Supplement: Supplementary file 6 [file afa1707b730357b684eed52e.docx]

**Table 1: Transcripts associated with IFN Type I present in the ileum of STAg treated mice (Infected vs. Uninfected).**

| **Gene ID** | **Log2 Fold Change** | **Gene name** |
| --- | --- | --- |
| Ddx60 | 2.45 | DEAD (Asp-Glu-Ala-Asp) box polypeptide 60 |
| Dhx58 | 2.82 | DEXH (Asp-Glu-X-His) box polypeptide 58 |
| Ifi204 | 3.09 | interferon activated gene 204 |
| Ifi44 | 4.95 | interferon-induced protein 44 |
| Ifit1 | 2.55 | interferon-induced protein with tetratricopeptide repeats 1 |
| Ifit1bl1 | 2.53 | interferon-induced protein with tetratricopeptide repeats 1B like 1 |
| Ifit2 | 4.68 | interferon-induced protein with tetratricopeptide repeats 2 |
| Ifit3 | 3.76 | interferon-induced protein with tetratricopeptide repeats 3 |
| Ifit3b | 3.48 | interferon-induced protein with tetratricopeptide repeats 3B |
| Igtp | 3.22 | Interferon-gamma induced GTPase |
| Irgm1 | 2.13 | immunity-related GTPase family M member 1 |
| Irgm2 | 2.18 | immunity-related GTPase family M member 2 |
| Mx2 | 3.17 | MX dynamin-like GTPase 2 |
| Oas1a | 2.47 | 2'-5' oligoadenylate synthetase 1ª |
| Oas1b | 2.88 | 2'-5' oligoadenylate synthetase 1B |
| Oas1g | 2.54 | 2'-5' oligoadenylate synthetase 1G |
| Oas1h | 2.74 | 2'-5' oligoadenylate synthetase 1H |
| Oas2 | 4.70 | 2'-5' oligoadenylate synthetase 2 |
| Oas3 | 3.39 | 2'-5' oligoadenylate synthetase 3 |
| Oasl1 | 2.06 | 2'-5' oligoadenylate synthetase-like 1 |
| Oasl2 | 2.75 | 2'-5' oligoadenylate synthetase-like 2 |
| Rnf213 | 2.11 | ring finger protein 213 |
| Rnf225 | 2.33 | ring finger protein 225 |
| Slfn1 | 3.16 | Schlafen 1 |
| Slfn10-ps_3 | 2.49 | Schlafen 10, Pseudogene |
| Slfn2 | 2.52 | Schlafen 2 |
| Slfn4 | 4.11 | Schlafen 4 |
| Slfn5 | 3.72 | Schlafen 5 |
| Slfn5_1 | 3.74 | Schlafen 5_1 |
| Slfn5_2 | 3.53 | Schlafen 5_2 |
| Slfn5_3 | 4.82 | Schlafen 5_3 |
| Tap1 | 2.10 | transporter 1, ATP-binding cassette, sub-family B (MDR/TAP) |
| Trim30a | 3.48 | tripartite motif-containing 30A |
| Trim30b | 2.26 | tripartite motif-containing 30B |
| Trim30c | 3.80 | tripartite motif-containing 30C |
| Usp18 | 4.41 | ubiquitin specific peptidase 18 |
