# Supplementary material for: Dual transcriptomics to determine interferon-gamma independent host response to intestinal Cryptosporidium parvum infection
Source: Research Square preprint supplement (doi:10.21203/rs.3.rs-491899/v1), 2021-05-14
Supplement: Supplementary file 8 [file 329f4e44b7b48b00bfc06d33.docx]

**Table 3: Top ten more abundant *C. parvum* transcripts in PBS-treated Ileum. (For a complete list see Supplemental File 11)**

|  | **CryptoDB_ID** | **Transcript Name** | **Average Counts** | **Mouse 1** | **Mouse 2** | **Mouse 3** |
| --- | --- | --- | --- | --- | --- | --- |
| 1 | cgd6_1080 | Glycoprotein gp40 | 50,954 | 20891 | 34483 | 97488 |
| 2 | cgd2_1373 | Unspecified product | 23,847 | 17477 | 15032 | 39033 |
| 3 | cgd6_3990 | Elongation factor 1-alpha | 22,218 | 9455 | 15754 | 41446 |
| 4 | cgd8_3520 | Uncharacterized secreted protein | 21,677 | 9928 | 16857 | 38247 |
| 5 | cgd5_1470 | Nucleoside diphosphate kinase | 17,366 | 7388 | 12296 | 32415 |
| 6 | cgd7_4020 | Cryptosporidial mucin | 16,472. | 6621 | 12245 | 30549 |
| 7 | cgd1_3810 | Uncharacterized protein | 16,058 | 7149 | 12082 | 28944 |
| 8 | cgd3_510 | GDP-fucose transporter | 14,106 | 6146 | 10245 | 25928 |
| 9 | cgd5_3160 | Actin | 13,058 | 5118 | 8647 | 25408 |
| 10 | cgd6_5410 | Uncharacterized secreted protein | 11,013 | 5104 | 8578 | 19357 |
