# Supplementary material for: Dual transcriptomics to determine interferon-gamma independent host response to intestinal Cryptosporidium parvum infection
Source: Research Square preprint supplement (doi:10.21203/rs.3.rs-491899/v1), 2021-05-14
Supplement: Supplementary file 9 [file 32b47da9ecc45eefce3c53e1.csv]

CryptoDB_ID	baseMean	F19-CECUM_S13-STAg	F20-CECUM_S15-STAg	F21-CECUM_S17-STAg	F22-CECUM_S19-PBS	F23-CECUM_S21-PBS	F24-CECUM_S23-PBS	log2FoldChange	lfcSE	stat	pvalue	padj
cgd6_4590	45.17167522	32	13	4	21	36	4	-1.496194042	0.346691776	-4.315631763	1.59E-05	0.018309872
cgd7_4710	49.53690134	44	17	4	20	41	9	-1.325333944	0.328522237	-4.034229022	5.48E-05	0.042017693
cgd8_1160	195.4338249	154	53	29	86	145	23	-1.237767423	0.2683039	-4.613303874	3.96E-06	0.009119282
