# Supplementary material for: Dual transcriptomics to determine interferon-gamma independent host response to intestinal Cryptosporidium parvum infection
Source: Research Square preprint supplement (doi:10.21203/rs.3.rs-491899/v1), 2021-05-14
Supplement: Supplementary file 11 [file 9ba7cc4df7b26e227c257f52.docx]

**Table S1: Reads per sample utilized for the mapping to a given genome, percentages represent the uniquely mapped reads per genome.**

| **Sample** | **Treatment** | **Reads (Million)** | ***Mus musculus*** | ***C. parvum*** |
| --- | --- | --- | --- | --- |
| Mouse 1-ILEUM | PBS | 84.92 | 81.38 % | N/A |
| Mouse 2-ILEUM | PBS | 74.73 | 83.62 % | N/A |
| Mouse 3-ILEUM | PBS | 75.19 | 80.65 % | N/A |
| Mouse 4-ILEUM | STAg | 77.68 | 84.32 % | N/A |
| Mouse 5-ILEUM | STAg | 75.48 | 79.29 % | N/A |
| Mouse 6-ILEUM | STAg | 74.67 | 79.55 % | N/A |
| Mouse 7-ILEUM | STAg | 93.03 | 76.66 % | 2.02 % |
| Mouse 8-ILEUM | STAg | 86.43 | 78.56 % | 1.89 % |
| Mouse 9-ILEUM | STAg | 74.11 | 76.17 % | 3.14 % |
| Mouse 10-ILEUM | PBS | 73.84 | 78.60 % | 1.21 % |
| Mouse 11-ILEUM | PBS | 88.92 | 75.48 % | 1.66 % |
| Mouse 12-ILEUM | PBS | 66.93 | 72.71 % | 5.56 % |
| Mouse 1-CECUM | PBS | 83.87 | 82.43 % | N/A |
| Mouse 2-CECUM | PBS | 84.09 | 82.34 % | N/A |
| Mouse 3-CECUM | PBS | 80.34 | 78.22 % | N/A |
| Mouse 4-CECUM | STAg | 72.90 | 76.92 % | N/A |
| Mouse 5-CECUM | STAg | 87.02 | 76.53 % | N/A |
| Mouse 6-CECUM | STAg | 67.14 | 76.14 % | N/A |
| Mouse 7-CECUM | STAg | 76.48 | 74.12 % | 0.86 % |
| Mouse 8-CECUM | STAg | 72.64 | 75.07 % | 0.37 % |
| Mouse 9-CECUM | STAg | 73.65 | 76.08 % | 0.18 % |
| Mouse 10-CECUM | PBS | 78.48 | 81.48 % | 0.19 % |
| Mouse 11-CECUM | PBS | 86.73 | 79.28 % | 0.27 % |
| Mouse 12-CECUM | PBS | 70.66 | 76.75 % | 0.12 % |
