# Supplementary material for: Dual transcriptomics to determine interferon-gamma independent host response to intestinal Cryptosporidium parvum infection
Source: Research Square preprint supplement (doi:10.21203/rs.3.rs-491899/v1), 2021-05-14
Supplement: Supplementary file 16 [file fca6dfe3153ba30066040c3a.csv]

CryptoDB_ID	baseMean	F19-ILEUM_S14-STAg	F20-ILEUM_S16-STAg	F21-ILEUM_S18-STAg	F22-ILEUM_S20-PBS	F23-ILEUM_S22-PBS	F24-ILEUM_S24-PBS	log2FoldChange	lfcSE	stat	pvalue	padj
cgd4_1620	65.67489308	149	92	110	113	184	366	-0.962965911	0.218543083	-4.406297827	1.05E-05	0.040820146
